# Supplementary material for: Automatic seizure detection based on the combination of newborn multi-channel EEG and HRV information
Source: Springer Nature journal article supplement (doi:10.1186/1687-6180-2012-215), 2012-10-07

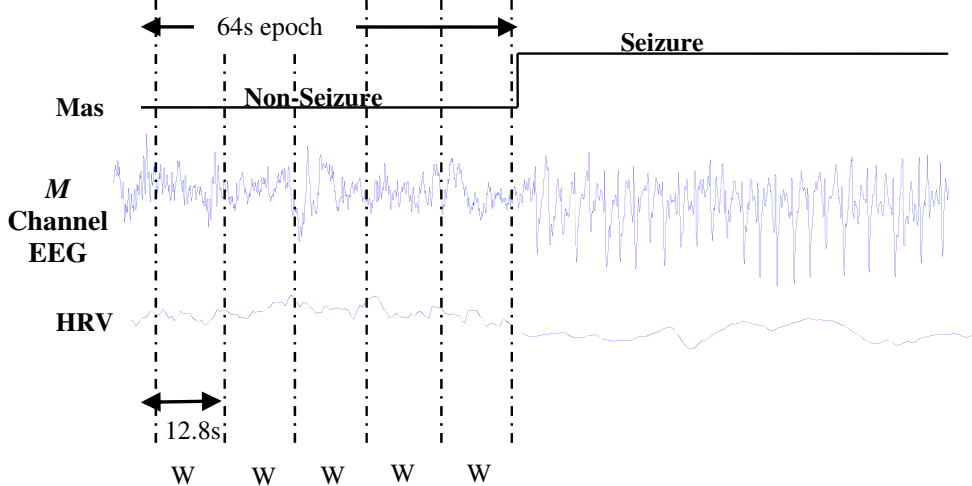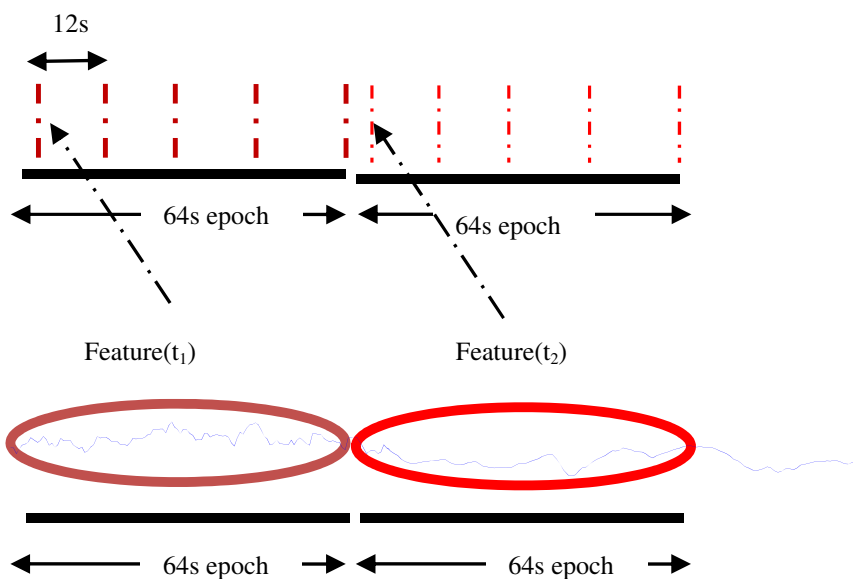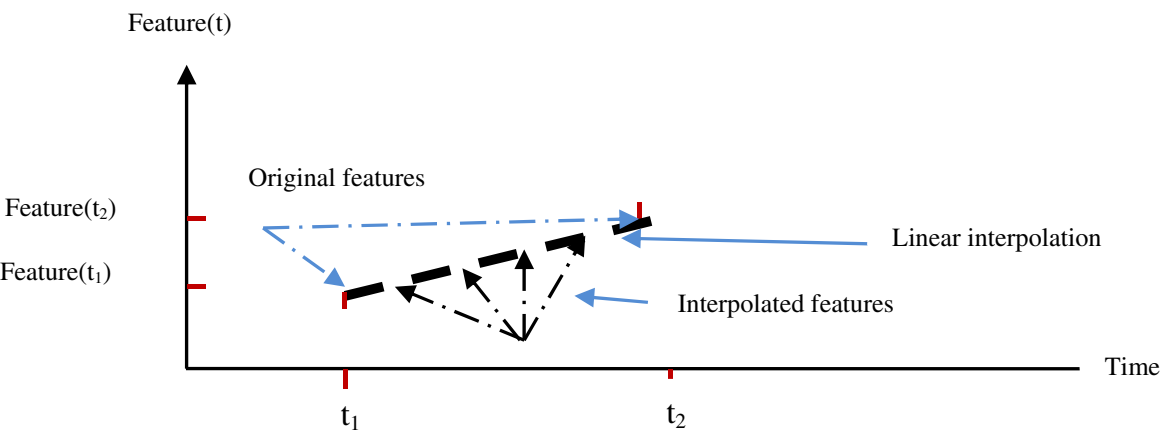

Supplement: 13634_2011_337_MOESM3_ESM.pdf [file 13634_2011_337_MOESM3_ESM.pdf]
